# Supplementary material
Source: Research Square preprint supplement (doi:10.21203/rs.3.rs-8913555/v1)
Supplement: Supplementary file 1 [file 734c61294e973f91b9c3ada9.docx]

**Supplemental methods**

**Isolation and culturing of CD8+ T Cells**

Peripheral blood mononuclear cells (PBMCs) were isolated from peripheral venous blood of ITP patients and HCs using Ficoll-Hypaque density gradient centrifugation (Amersham Biosciences). CD8+ T cells were sorted from PBMCs by magnetic microbeads and MS separation columns (Miltenyi Biotec), with a purity of more than 90% as confirmed by flow cytometry (FCM). For *in vitro* culture, CD8+ T cells were maintained in RPMI 1640 medium (Life Technologies) supplemented with 10% heat-inactivated fetal bovine serum (FBS; Gibco) and 1% penicillin and streptomycin (Solarbio). Cells were stimulated with anti-human CD3 antibodies (1 μg/ml; eBioscience), anti-human CD28 antibodies (1 μg/ml; eBioscience) and recombinant human interleukin-2 (rhIL-2, 10 ng/ml; PeproTech) for 72 h at 37°C in a 5% CO2 atmosphere, in the presence of KD025 (MCE; 1 μM), IL-6 (PeproTech; 50 ng/ml) or 0.1% DMSO(Sigma-Aldrich). After incubation, CD8+ T cells were collected for CTL proliferation, CTLs-mediated platelet apoptosis and activation assays by FCM, and quantitative real-time polymerase chain reaction (qRT-PCR). Culture supernatants from KD025- or DMSO-treated CD8+ T cells were collected for enzyme-linked immunosorbent assay (ELISA).

### Flow cytometry

Human PBMCs or CD8+ T cells from ITP patients and HCs were stimulated with anti-human CD3/CD28 antibodies (1 μg/ml), rhIL-2 (10 ng/ml) and cultured in the presence of KD025 (1 µM), IL-6 (50 ng/mL), or 0.1% DMSO (control). After incubation, cells were harvested from 24-well plates and adjusted to a final concentration of 1 × 10⁶ cells/ml. In parallel, single-cell suspensions were prepared from mouse spleens in the ITP model by gentle mechanical dissociation and filtered through a 70-μm cell strainer to obtain comparable cell concentrations for analysis.

For apoptosis assessment, PBMCs were stained with fluorescein isothiocyanate (FITC)-Annexin V and propidium iodide (PI) using a Cell Apoptosis Kit (BestBio). Stained cells were subsequently analyzed using a Gallios Flow cytometer (Beckman Coulter). Data were processed using Kaluza (Beckman Coulter).

CTL proliferation was assessed by FCM. Proliferation was measured using the division index, defined as the total number of cell divisions divided by the number of cells before stimulation. Data analysis was performed using NovoExpress (Agilent).

For detection of phosphorylated STAT3 (p-STAT3), PBMCs were isolated and cultured *in vitro*. Cells were incubated with anti-CD3/CD28 antibodies and either KD025 or DMSO for 1 hour, then stimulated with IL-6 for an additional 15 minutes. Next, cells were resuspended in cold PBS, and stained with FITC-conjugated anti-CD8 monoclonal antibodies (mAbs). Cells were then fixed with Phosflow Lyse/Fix buffer (BD Bioscience), permeabilized with 90% methanol on ice, and stained with APC-conjugated anti-p-STAT3 mAbs in PBS. For analysis, the cells were acquired on a NovoCyte Quanteon (Agilent), and data were analyzed using NovoExpress (Agilent).

**CD8⁺ T cell-platelet coculture system**

For experiments involving ITP patients, isolated CD8⁺ T cells were cultured in complete RPMI 1640 medium supplemented with 10% fetal bovine serum and 1% penicillin and streptomycin. Cells were stimulated with anti-human CD3/CD28 antibodies and treated with KD025, IL-6, or 0.1% DMSO for 72 hours *in vitro*. Cells were then thoroughly washed to remove residual compounds. Platelets used in the coculture shared identical ABO and Rh blood types with the cytotoxic ITP patient-derived CTLs. CD8⁺ T cells and platelets were adjusted to final concentrations of 1 × 10⁵/mL and 1 × 10⁶/mL, respectively, and cocultured for 4 hours at 37°C.

For murine experiments, *Cd61* knockout (*Cd61*⁻/⁻) mice immunized with WT platelets weekly were concurrently treated with KD025 (100 mg/kg, oral gavage; MedChemExpress) or 2% DMSO (oral gavage; Sigma-Aldrich) as a control, administered daily for 4 consecutive weeks. In the active ITP mouse model, mice were treated with 2% DMSO control (intraperitoneal injection, once every 2 days and oral, gavage every day; Sigma-Aldrich), KD025 (100 mg/kg/day, oral gavage; MedChemExpress), IL‑6 (2 mg/kg, intraperitoneal injection, once every 2 days; PeproTech), and the combination of IL-6 and KD025 for 4 consecutive weeks. After treatment, splenocytes were harvested from both immunized *Cd61*⁻/⁻ mice and active ITP mice, and CD8⁺ T cells were isolated using a negative-selection magnetic bead kit (Miltenyi Biotec). Platelets were isolated from WT mice. CD8⁺ T cells and platelets were adjusted to concentrations of 1 × 10⁵/mL and 1 × 10⁶/mL, respectively, and cocultured for 4 hours at 37°C.

To evaluate CTL-mediated platelet apoptosis, platelets were stained with JC-1 using a mitochondrial membrane potential assay kit (Beyotime). JC-1 aggregates (red fluorescence) indicated viable platelets, whereas JC-1 monomers (green fluorescence) indicated apoptotic platelets. Platelets were identified as APC-conjugated anti-CD61⁺ (eBioscience) events by flow cytometry, and the percentage of JC-1 monomer-positive CD61⁺ platelets was defined as the platelet apoptosis rate. Spontaneous platelet apoptosis was determined in samples containing platelets cultured in medium alone. CTL-induced platelet apoptosis was calculated as the difference between apoptosis observed in coculture conditions and spontaneous apoptosis.

In parallel, platelet activation was assessed by staining with PE-conjugated anti-CD62P mAbs (eBioscience), and the geometric mean fluorescence intensity (MFI) of CD62P expression on platelets was quantified.

To assess CD8⁺ T-cell degranulation and CTL-platelet aggregate formation, cocultures were stained with FITC-conjugated anti-CD8 mAbs, APC-conjugated anti-CD61 mAbs, and APC-conjugated anti-CD107a mAbs (eBioscience). Samples were analyzed using a Gallios flow cytometer (Beckman Coulter) or a NovoCyte Quanteon (Agilent). Data were processed using Kaluza (Beckman Coulter) or NovoExpress (Agilent) software.

### Quantitative real-time polymerase chain reaction analysis

Total mRNA was extracted from CD8+ T cells using a Total RNA Rapid Extraction Kit (Vazyme), and cDNA was synthesized with a high-capacity cDNA Reverse Transcription Kit (Vazyme) according to the manufacturer's instructions. Quantitative real-time PCR (qRT-PCR) was performed using a SYBR Green PCR Master Mix (Vazyme) on a StepOne Real-Time PCR System (Thermo Fisher Scientific). Relative gene expression was calculated using the 2⁻ΔΔCt method. Data were analyzed using StepOne software (Thermo Fisher Scientific). Primer sequences and PCR conditions used were listed in **Table 2**.

**Seahorse metabolic flux analysis**

The extracellular acidification rate (ECAR) and oxygen consumption rate (OCR) of CD8⁺ T cells were measured using a Seahorse XFe96 Analyzer (Agilent). Briefly, purified CD8+ T cells (1 × 10⁵ per well) sorted from PBMCs were seeded onto Cell-Tak-coated XF96 cell culture microplates (Corning). The medium was supplemented with 1 mM sodium pyruvate, 2 mM glutamine, and 25 mM glucose, adjusted to pH 7.4, and incubated at 37°C for 1 hour in a non-CO₂ incubator. ECAR (mpH/min) was recorded under basal conditions and after sequential injection of 10 mM glucose, 1 μM oligomycin, and 50 mM 2-DG; OCR (pmol/min) was recorded under basal conditions and after sequential injection of 10 μM oligomycin, 1.5 μM carbonyl cyanide-4-(trifluoromethoxy)phenylhydrazone (FCCP), and a mixture of 1 μM rotenone plus 1 μM antimycin A. Glycolysis and glycolytic capacity were calculated as the average of 3 consecutive measurements following the addition of glucose and oligomycin, respectively. Basal OCR was defined as the mean of three measurements before oligomycin injection, and maximal OCR as the mean of three measurements following FCCP injection. Spare respiratory capacity (SRC) was calculated as maximal OCR minus basal OCR. Data were analyzed using Wave software (Agilent v.2.6.1).

**Immunofluorescence staining**

For immunofluorescence analysis, tissue sections were prepared from splenectomy specimens obtained from ITP patients and from healthy control donors undergoing splenectomy for traumatic injury, as well as from spleen tissues of active ITP mice and WT mice. For analysis of CD8⁺ T cell-platelet aggregates, following coculture, cells were mounted onto poly-L-lysine–coated glass slides (Sigma-Aldrich). Tissue sections or cell smears were fixed in 4% paraformaldehyde and permeabilized with 0.2% Triton X-100, followed by blocking with 2% bovine serum albumin (BSA; Thermo Fisher Scientific) for 30 minutes at room temperature. Samples were then incubated overnight at 4°C with primary antibodies, including anti-CD8 (Abcam), anti-ROCK2 (Abcam), and anti-CD61 (Abcam). After washing, sections were incubated for 2 hours at room temperature with species-appropriate Alexa Fluor–conjugated secondary antibodies (Abcam). Nuclei were counterstained with DAPI (Abcam), and confocal fluorescence images were acquired using an LSM710 confocal microscope (Zeiss).

**Enzyme-linked immunosorbent assay**

Levels of granzyme A, granzyme B, and perforin in culture supernatants were determined using commercial sandwich ELISA kits (Human Granzyme A ELISA Kit, Human Granzyme B ELISA Kit, and Human Perforin ELISA Kit; Multi sciences). All assays were performed according to the manufacturer's instructions. Briefly, standards and appropriately diluted samples were added in duplicate to 96-well plates pre-coated with specific capture antibodies and incubated at room temperature for the recommended time. After washing, horseradish peroxidase (HRP)-conjugated detection antibodies were added, followed by incubation and additional washes. Color development was initiated by adding tetramethylbenzidine (TMB) substrate solution and stopped with 1 - 2 N sulfuric acid. Absorbance was measured at 450 nm with a reference wavelength of 570-620 nm using a microplate reader. Analyte concentrations were calculated from standard curves generated using serial dilutions of recombinant standards. The low detection limit for granzyme A was 0.31 pg/ml, for granzyme B was 3.54 pg/ml, and for perforin was 19.5 pg/ml.

**RNA Sequencing (RNA-seq)**

Purified CD8⁺ T cells were cultured in complete RPMI-1640 medium supplemented with 10% FBS and antibiotics, and then treated with KD025 (1 μM) or DMSO (0.1%) for 24 hours. After treatment, cells were harvested, and total RNA was extracted using the Trizol Reagent (Invitrogen Life Technologies) according to the manufacturer’s instructions. RNA concentration and purity were assessed with a NanoDrop spectrophotometer (Thermo Scientific). For each sample, 3 μg of total RNA was used as input for mRNA‑seq library construction. Sequencing libraries were generated according to the following steps. mRNA was purified from total RNA using poly-T oligo-attached magnetic beads. Fragmentation was carried out using divalent cations at elevated temperature in an Illumina proprietary fragmentation buffer. First strand cDNA was synthesized using random oligonucleotides and SuperScript II. Second strand cDNA synthesis was subsequently performed using DNA Polymerase I and RNase H. Remaining overhangs were converted into blunt ends via exonuclease/polymerase activities, and the enzymes were then removed. After adenylation of the 3' ends of the DNA fragments, Illumina paired‑end (PE) adapter oligonucleotides were ligated to prepare for hybridization. To select cDNA fragments with a preferred length of 400 - 500 bp, the library fragments were purified using the AMPure XP system (Beckman Coulter). DNA fragments with ligated adaptor molecules on both ends were selectively enriched using Illumina PCR Primer Cocktail in a 15-cycle PCR reaction. Products were purified (AMPure XP system) and quantified using the Agilent high sensitivity DNA assay on a Bioanalyzer 2100 system (Agilent). The sequencing library was then sequenced on NovaSeq 6000 platform (Illumina).

**Statistical analysis**

All data were expressed as mean ± standard deviation (SD) or median with range. The Shapiro-Wilk test was used to assess the normality of distribution. Descriptive statistics were used to summarize demographic and baseline clinical characteristics of enrolled patients. For comparisons among more than 2 groups, one-way analysis of variance (ANOVA) followed by Student-Newman-Keuls post hoc test was used for normally distributed data; otherwise, the Kruskal-Wallis H test and Nemenyi post hoc test were employed. Differences between 2 independent groups were determined using the Student’s *t*-test or Mann-Whitney U test. Paired t-tests were used for paired samples. Categorical variables were compared using the chi-squared test or Fisher's exact test. All tests were performed using IBM SPSS® Statistics, version 27 (IBM Corp.). Graphs were generated with GraphPad Prism 9.0 (GraphPad Software) and arranged in Adobe Illustrator 2022 (Adobe Inc.). All tests were two‑sided, and *P* < 0.05 was considered statistically significant.

**Supplemental results**

**Supplemental Table 1. Clinical characteristics of enrolled ITP patients**

| **Patients No.** | **Sex/Age (years)** | **PLT**  **(× 109/L)** | **Bleeding symptoms** | **Anti-GPIIb/IIIa** | **Anti-GPIb/IX** | **Major previous**  **drugs** |
| --- | --- | --- | --- | --- | --- | --- |
| CTL-mediated active ITP | | | | | | |
| 1 | M/21 | 29 | PT + EC | - | - | Pred, IVIG, rhTPO |
| 2 | F/45 | 28 | PT + EC | - | - | Pred, IVIG, rhTPO |
| 3 | F/27 | 5 | ME + EC | + | - | Pred, rhTPO |
| 4 | F/34 | 1 | EC + GH | - | - | DEX, rhTPO, IVIG |
| 5 | F/60 | 11 | - | - | - | Pred, IVIG |
| 6 | F/19 | 22 | PT + EC | - | - | Pred, TPO-RA |
| 7 | M/33 | 6 | PT + EP | - | - | Pred |
| 8 | F/68 | 15 | PT + EC | - | - | DEX |
| 9 | M/58 | 8 | EC + GIH | - | - | Pred, IVIG |
| 10 | F/57 | 15 | PT + GH | - | - | Pred, rhTPO |
| 11 | F/42 | 11 | - | - | - | DEX |
| 12 | F/43 | 20 | EC | - | - | Pred, IVIG |
| 13 | M/55 | 23 | - | - | - | Pred, rhTPO |
| 14 | F/57 | 15 | EC | - | - | DEX, IVIG |
| 15 | M/23 | 25 | PT | - | - | Pred, IVIG |
| 16 | F/53 | 5 | PT + GH + CH | - | - | DEX, rhTPO |
| 17 | M/51 | 13 | - | - | + | Pred, IVIG, rhTPO |
| ITP in remission | | | | | | |
| 1 | F/32 | 180 | - | ND | ND | Pred, CsA, RTX |
| 2 | F/67 | 210 | - | ND | ND | DEX, IVIG, rhIL-11 |
| 3 | F/78 | 250 | - | ND | ND | Pred, rhTPO, Dana |
| 4 | M/67 | 310 | - | ND | ND | DEX, IVIG, rhIL-11 |
| 5 | M/51 | 270 | - | ND | ND | Pred, rhTPO, RTX |
| 6 | M/32 | 240 | - | ND | ND | Pred, rhTPO |

Note: CH, cerebral hemorrhage; CsA, ciclosporin; Dana, danazol; EC, ecchymoses; DEX, dexamethasone; EP, epistaxis; F, female; GH, gingival hemorrhage; GIH, gastrointestinal hemorrhage; ITP, primary immune thrombocytopenia; IVIG, intravenous gamma globulin; M, male; ME, menorrhagia; Pred, prednisone; PT, petechiae; rhIL-11, recombinant human interleukin-11; rhTPO, recombinant human thrombopoietin; RTX, rituximab; TPO-RA, thrombopoietin receptor agonist; ND, not determined; -, no bleeding symptom.

**Supplemental Table 2. Primers and conditions for qRT-PCR**

| **Gene** | **Sequence (5’ - 3’)** | **Annealing T (˚C)** | **Product (bp)** |
| --- | --- | --- | --- |
| ROCK2 | F: AACGTCAGGATGCAGATGGG  R: CAGCCAAAGAGTCCCGTTCA | 60 | 186 |
| Rock2 | F: CCGACTACATATCGCCCGAG  R: CACCAATCACATTCTCGCCC | 60 | 73 |
| GZMA | F: AAGGGGGACGATGTGAAACC  R: AGGCTTCCAGCACAAACCAT | 60 | 191 |
| GZMB | F: GAGAGAAAGGCCAAGCGGAC  R: TCGATCTTCCTGCACTGTCAT | 60 | 171 |
| PRF1 | F: CTTCCACCAAACCTACCGGG  R: GGGTTCCAGGGTGTAGTCCA | 60 | 163 |
| TBX21 | F: CAACGCTTCCAACACGCATA  R: ATTCTGGTAGGCAGTCACGG | 60 | 70 |
| EOMES | F: GGCGCATGTTTCCTTTCTTGA  R: GCACCACCTCTACGAACACA | 60 | 81 |
| GLUT1 | F: TGTGTATGCCACCATTGGCT  R: CTAGCGCGATGGTCATGAGT | 60 | 149 |
| HK2 | F: GCACGTTTGCACCATTGTCT  R: TTGTGGAAACGCCGGGAATA | 60 | 171 |
| LDHA | F: TGGGAACAAGGTTAAAGCCGA  R: AAAACCCACCAGCCTTCTGT | 60 | 158 |
| PKM2 | F: AATCACGCTGGATAACGCCT  R: TCGGCACCTTTCTGCTTCAC | 60 | 150 |
| ACTB (β‑actin) | F: GAAGAGCTACGAGCTGCCTGA  R: CAGACAGCACTGTGTTGGCG | 60 | 191 |
| Actb  (β‑actin) | F: GGCTGTATTCCCCTCCATCG  R: CCAGTTGGTAACAATGCCATGT | 60 | 154 |

**Supplementary Figure legends**

**Supplementary Figure 1. KD025 attenuated proliferation of CTLs from ITP patients *in vitro*.** (**A**) Representative density plots of apoptosis of PBMC from ITP patients cultured with increasing doses of KD025. Annexin V⁺/PI⁻ cells indicated early apoptosis. Dose-response of KD025 on PBMC apoptosis after 3 days of culture. Apoptosis rates were as follows: DMSO, 21.47 ± 3.37%; 0.5 μM KD025, 20.00 ± 4.41%; 1 μM, 22.20 ± 4.03%; 5 μM, 28.50 ± 3.62%; 10 μM, 45.16 ± 4.40%. Compared with DMSO, no significant pro‑apoptotic effect was observed at 0.5 μM (*P* = 0.970) or 1 μM (*P* = 0.990), whereas apoptosis was significantly increased at 5 μM (*P* = 0.040) and 10 μM (*P* < 0.001). (**B**) Representative CFSE histograms of CD8+ T cells cultured with KD025 or DMSO. Division index of CD8+ T-cell proliferation with KD025 and DMSO, demonstrating significant suppression of CD8⁺ T‑cell proliferation by KD025 (0.122 ± 0.015 *vs.* 0.306 ± 0.014, *P <* 0.001).

**Supplementary Figure 2. KD025 mitigates cytotoxic function of CD8⁺ T cell *in vivo*.**

1. Representative FCM plots of platelet apoptosis after 4‑hour co‑culture with splenic CD8⁺ T cells isolated from *Rag1-/-* mice treated with DMSO (control), IL‑6, KD025 or IL‑6 plus KD025. (**B**) Representative histograms of platelet CD62P expression after co‑culture with splenic CD8⁺ T cells from the four treatment groups: control, IL‑6, KD025, and IL‑6 plus KD025. (**C**) Representative histograms of CD107a expression on splenic CD8⁺ T cells from the control, IL‑6, KD025, and IL‑6 plus KD025 groups. (**D**) Representative dot plots of splenic CTL-platelet aggregates (CD8⁺CD61⁺) from the control, IL‑6, KD025, and IL‑6 plus KD025 groups.

**Supplementary Figure 1**

**
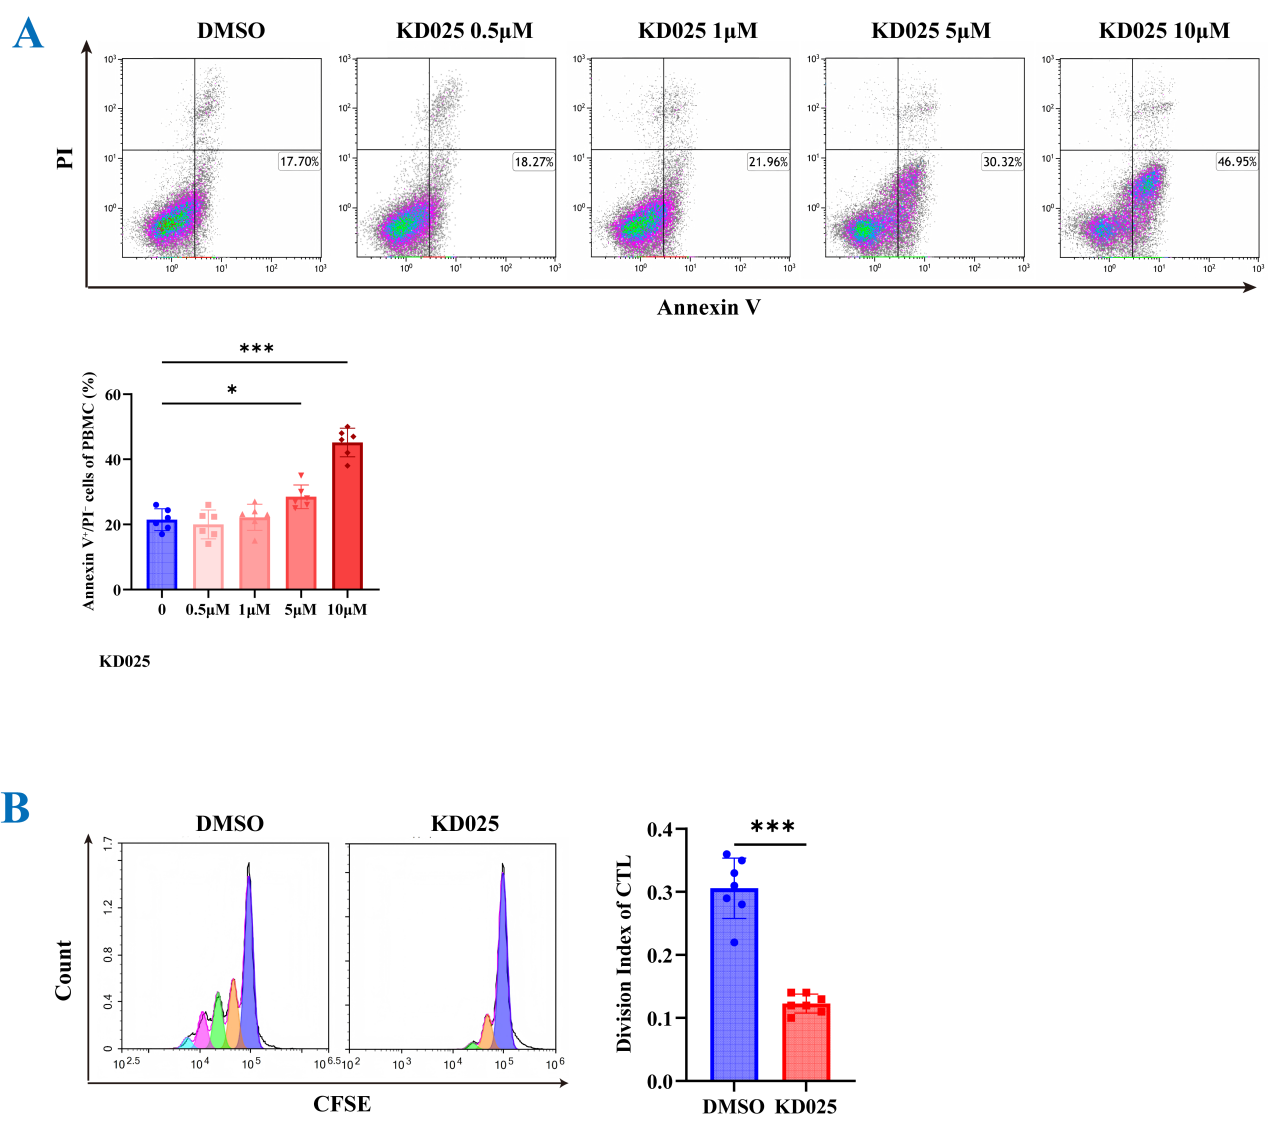
**

**Supplementary Figure 2**

**
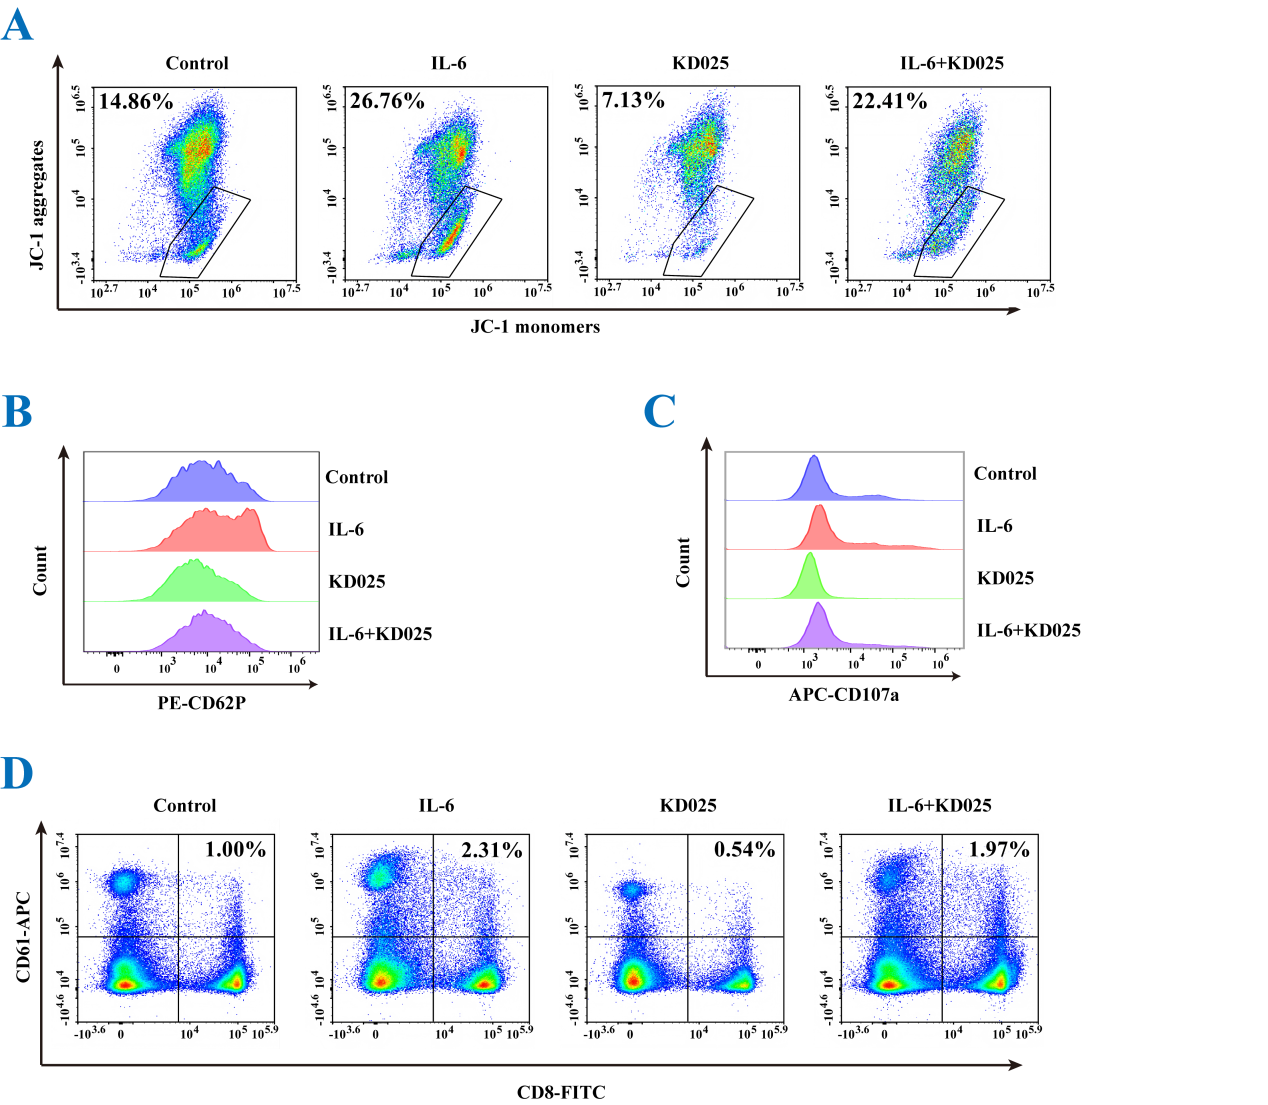
**
